# Supplementary material for: Three-dimensional analysis of mitosis and cytokinesis in the binucleate parasiteGiardia intestinalis
Source: Oxford University Press journal article supplement (doi:10.1242/jcs.03276), 2006-11-15
Supplement: jcs03276tables1.pdf [file jcs03276tables1.pdf]

**Table S1. Percentage of mitotic cells in semi-synchronous cultures following the replacement of fresh medium at one-hour intervals**

|                               | <b>Interphase</b> | <b>Mitotic (all stages)</b> | <b>Cytokinesis</b> |
|-------------------------------|-------------------|-----------------------------|--------------------|
| <b>Control (<i>n</i>=524)</b> | <b>97%</b>        | <b>1.3%</b>                 | <b>0.9%</b>        |
| <b>3 hours (<i>n</i>=524)</b> | <b>92%</b>        | <b>4.3%</b>                 | <b>3.4%</b>        |
| <b>4 hours (<i>n</i>=547)</b> | <b>82%</b>        | <b>11.8%</b>                | <b>2.1%</b>        |
| <b>5 hours (<i>n</i>=551)</b> | <b>92%</b>        | <b>1.4%</b>                 | <b>5.6%</b>        |
